# Supplementary material
Source: PubMed Central journal article supplement (PMC7490400)
Supplement: 41396_2020_695_MOESM5_ESM.pdf [file 41396_2020_695_MOESM5_ESM.pdf]

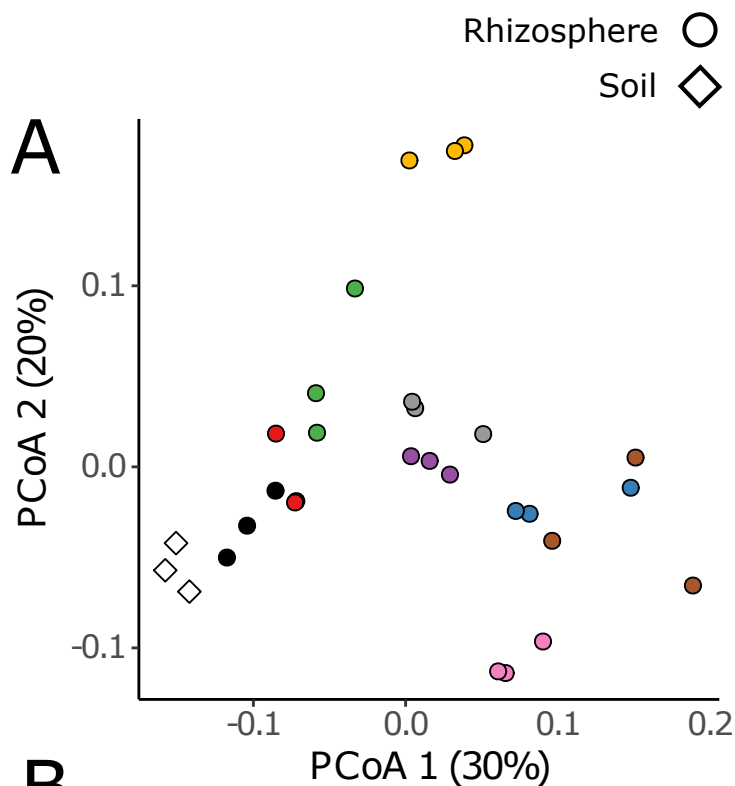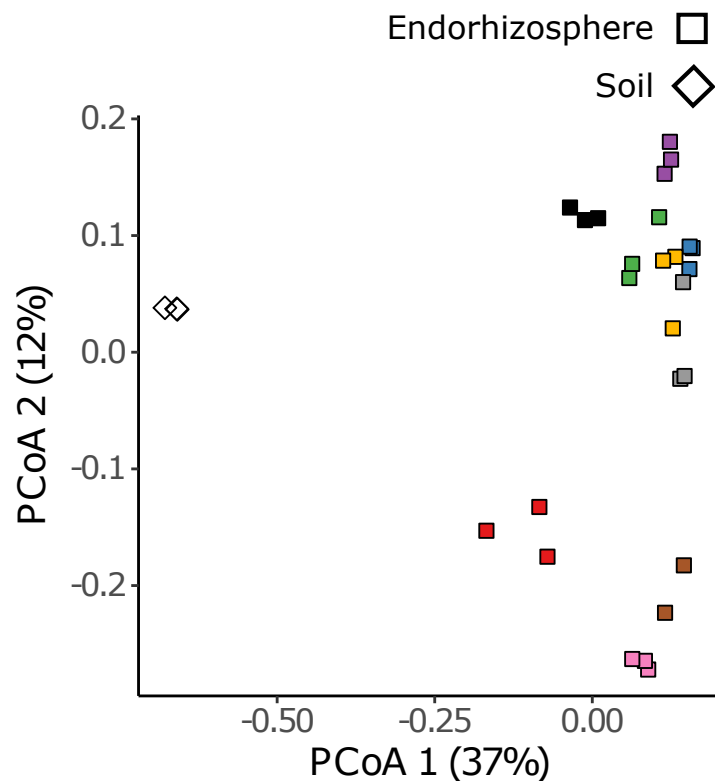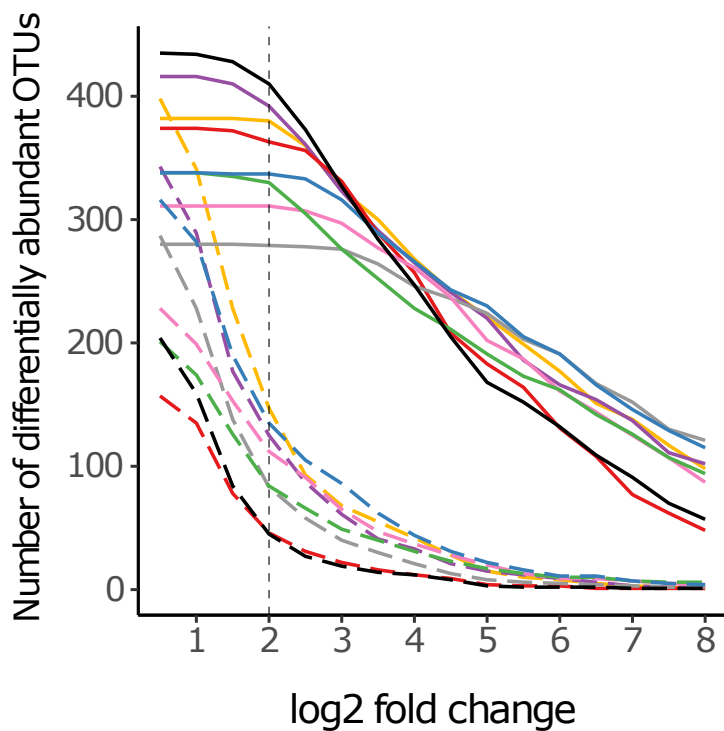

- *Arabidopsis thaliana* (AT)
- *Crepis capillaris* (CC)
- *Hypericum perforatum* (HP)
- *Lotus corniculatus* (LC)
- *Leucanthemum vulgare* (LV)
- *Myosotis arvensis* (MA)
- *Plantago lanceolata* (PL)
- *Taraxacum officinale* (TO)
- *Tanacetum vulgare* (TV)
